# Supplementary material
Source: publisher site journal article supplement (https://www.dovepress.com/article/167398)
Supplement: Supplementary file 1 [file get_supplementary_file.php%3Ff%3D167398.pdf]

**Table S1** Clinical and pathological characteristics in 702 colorectal cancer patients.

| Variables         | Categories | No. of patients (%)  |
|-------------------|------------|----------------------|
| Gender            | Male       | 440(62.7)            |
|                   | Female     | 262(37.3)            |
| Age               | ≤60years   | 313(44.6)            |
|                   | >60years   | 389(55.4)            |
| Tobacco           | Yes        | 120(17.1)            |
|                   | No         | 582(82.9)            |
| Alcohol           | Yes        | 63(9.0)              |
|                   | No         | 639(91.0)            |
| Hypertension      | Yes        | 143(20.4)            |
|                   | No         | 559(79.6)            |
| Diabetes          | Yes        | 52(7.4)              |
|                   | No         | 650(92.6)            |
| Tumor stage       | I          | 91(13.0)             |
|                   | II         | 309(44.0)            |
|                   | III        | 302(43.0)            |
| Depth of invasion | T1-T2      | 107(15.2)            |
|                   | T3-T4      | 595(84.8)            |
| Lymph node        | N0         | 400(57.0)            |
|                   | N1-N2      | 302(43.0)            |
| Tumor size        | ≤5cm       | 442(63.0)            |
|                   | >5cm       | 260(37.0)            |
| Differentiation   | G1-G2      | 627(89.3)            |
|                   | G3-G4      | 75(10.7)             |
| Chemotherapy      | Yes        | 464(66.1)            |
|                   | No         | 238(33.9)            |
| Fib               | mg/L       | 3.18(1.12-6.40)      |
| Alb               | g/L        | 39.36(13.60-53.60)   |
| pre-Alb           | mg/L       | 190.05(17.10-463.50) |
| FPR               |            | 16.15(4.32-216.37)   |
| AFR               |            | 12.66(3.54-37.14)    |
| CEA               | ≤5 ng/mL   | 424(60.4)            |
|                   | >5 ng/mL   | 210(29.9)            |
| CA199             | NA         | 68(9.7)              |
|                   | ≤37 U/mL   | 538(76.6)            |
|                   | >37 U/mL   | 94(13.4)             |
| CCI score         | NA         | 70(10.0)             |
|                   | 0          | 323(62.0)            |
|                   | 1          | 152(29.2)            |
| CFI score         | 2          | 46(8.8)              |
|                   | 0          | 228(43.6)            |
|                   | 1          | 209(40.0)            |
|                   | 2          | 86(16.4)             |

|           |   |           |
|-----------|---|-----------|
|           | 0 | 210(40.3) |
| CCF score | 1 | 190(36.5) |
|           | 2 | 97(18.6)  |
|           | 3 | 24(4.6)   |

---

**Abbreviation:** Fib: fibrinogen; Alb: albumin; pre-Alb: pre-albumin; AFR: Alb/Fib ratio; FPR: Fib/pre-Alb ratio; CEA: carcinoembryonic antigen; CA199: carbohydrate antigen 19-9; NA: not available; CCI: CEA-CA199 score; CFI: CEA- FPR score; CCF: CEA-CA199-FPR score.

**Table S2** The association between patients' pathological data and inflammatory biomarkers

| Variables             | tumor stage        |                    | <i>p</i>     | tumor grade        |                    | <i>p</i> | Depth of invasion  |                    | <i>p</i>     | Lymph node         |                    | <i>p</i>     | tumor size         |                    | <i>p</i>     |
|-----------------------|--------------------|--------------------|--------------|--------------------|--------------------|----------|--------------------|--------------------|--------------|--------------------|--------------------|--------------|--------------------|--------------------|--------------|
|                       | I-II               | III-IV             |              | G1-G2              | G3-G4              |          | T1-T2              | T3-T4              |              | N0                 | N1-N2              |              | <5                 | >5                 |              |
| <b>FPR</b>            | 15.44(11.42-22.40) | 17.47(11.80-27.35) | <b>0.011</b> | 16.26(11.69-24.21) | 14.94(9.92-25.27)  | 0.258    | 12.39(9.63-15.70)  | 17.41(12.37-26.19) | <b>0.000</b> | 15.44(11.42-22.40) | 17.48(11.80-27.35) | <b>0.011</b> | 14.07(10.79-19.94) | 22.73(14.98-34.20) | <b>0.000</b> |
| <b>AFR</b>            | 12.89(10.34-15.58) | 12.22(9.77-16.09)  | 0.182        | 12.63(10.04-15.81) | 12.83(10.36-15.83) | 0.608    | 14.37(12.15-17.26) | 12.20(9.93-15.55)  | <b>0.000</b> | 12.89(10.34-15.58) | 12.22(9.77-16.09)  | 0.182        | 13.72(11.17-16.33) | 10.84(8.63-13.84)  | <b>0.000</b> |
| <b>Fib (g/l)</b>      | 3.10(2.52-3.61)    | 3.25(2.51-3.92)    | 0.099        | 3.17(2.51-3.72)    | 3.25(2.56-3.70)    | 0.875    | 2.87(2.31-3.42)    | 3.23(2.58-3.84)    | <b>0.000</b> | 3.10(2.52-3.61)    | 3.25(2.51-3.92)    | 0.099        | 2.93(2.45-3.52)    | 3.46(2.86-4.13)    | <b>0.000</b> |
| <b>Alb (g/l)</b>      | 39.18(36.00-42.10) | 39.60(36.62-42.00) | 0.550        | 39.20(36.08-42.06) | 39.64(37.00-42.30) | 0.292    | 41.31(38.59-43.78) | 39.08(35.80-41.78) | <b>0.000</b> | 39.18(36.00-42.10) | 39.60(36.62-42.00) | 0.550        | 40.00(37.24-42.59) | 37.93(34.80-40.95) | <b>0.000</b> |
| <b>pre-Alb (mg/l)</b> | 195.3(148.0-242.9) | 183.7(133.1-230.7) | 0.051        | 188.3(138.3-236.5) | 209.4(143.7-253.9) | 0.173    | 218.7(177.6-278.3) | 183.8(133.1-230.9) | <b>0.000</b> | 195.3(148.0-242.9) | 183.7(133.1-230.7) | 0.051        | 205.6(159.2-247.5) | 156.2(113.5-214.4) | <b>0.000</b> |

\*Normality test procedure indicated that these data don't follow normal distribution. The variables were presented by the median (25%-75% quartile). Difference between groups was tested by Mann-Whitney U.

**Table S3** Univariate and multivariate analyses of CCI, CFI and CCF for three-year overall survival in CRC by Cox regression model.

| Ratio | Score | Univariate analysis |              |          | Multivariate analysis |              |          |
|-------|-------|---------------------|--------------|----------|-----------------------|--------------|----------|
|       |       | HR                  | (95% CI)     | <i>p</i> | HR                    | (95% CI)     | <i>p</i> |
| CCI   | 0     |                     |              |          |                       |              |          |
|       | 1     | 2.495               | 1.509-4.125  | <0.001   | 2.289                 | 1.375-3.811  | 0.001    |
|       | 2     | 5.926               | 3.348-10.489 | <0.001   | 5.612                 | 3.115-10.111 | <0.001   |
| CFI   | 0     |                     |              |          |                       |              |          |
|       | 1     | 3.021               | 1.633-5.588  | <0.001   | 2.748                 | 1.468-5.146  | 0.002    |
|       | 2     | 6.957               | 3.686-13.134 | <0.001   | 5.904                 | 3.088-11.289 | <0.001   |
| CCF   | 0     |                     |              |          |                       |              |          |
|       | 1     | 2.770               | 1.413-4.125  | 0.003    | 2.578                 | 1.302-5.103  | 0.007    |
|       | 2     | 5.902               | 2.999-11.614 | <0.001   | 4.753                 | 2.366-9.552  | <0.001   |
|       | 3     | 12.082              | 5.405-27.007 | <0.001   | 11.518                | 5.049-26.041 | <0.001   |

**Abbreviation:** HR: hazard ratio; CI: confidence interval; CCI: CEA-CA199 score; CFI: CEA- FPR score; CCF: CEA-CA199-FPR score.

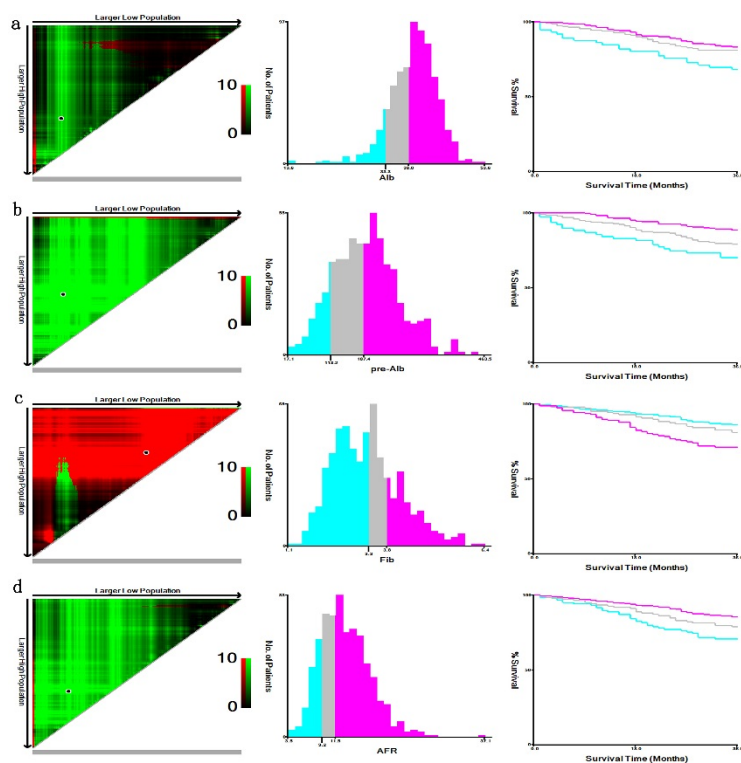

**Figure S1 The X-tile plots of preoperative circulating Alb (a), pre-Alb (b), Fib (c) and AFR (d) in 702 surgically resected CRC patients.**

Abbreviations: AFR, albumin-to-fibrinogen ratio; Alb, albumin; Fib, fibrinogen; pre-Alb, pre-albumin.

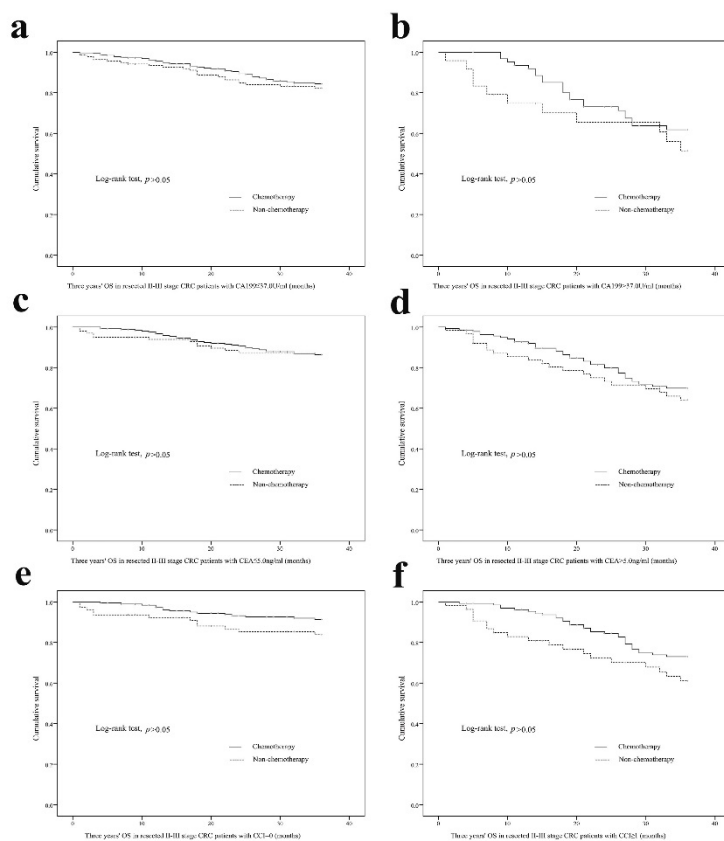

**Figure S2 Kaplan-Meier curves analysis of stage II-III CRC patients whether or not receiving adjuvant chemotherapy with high or low subgroups according to CA199, CEA and CCI. a: CA199 $\leq$ 37.0U/ml; b: CA199 $>$ 37.0U/ml; c: CEA $\leq$ 5.0ng/ml; d: CEA $>$ 5.0ng/ml; e: CCI=0; f: CCI $\geq$ 1.**

Abbreviations: CA199, carbohydrate antigen 19-9; CCI, CEA-CA199; CEA, carcinoembryonic antigen; CRC, colorectal cancer.

**a**

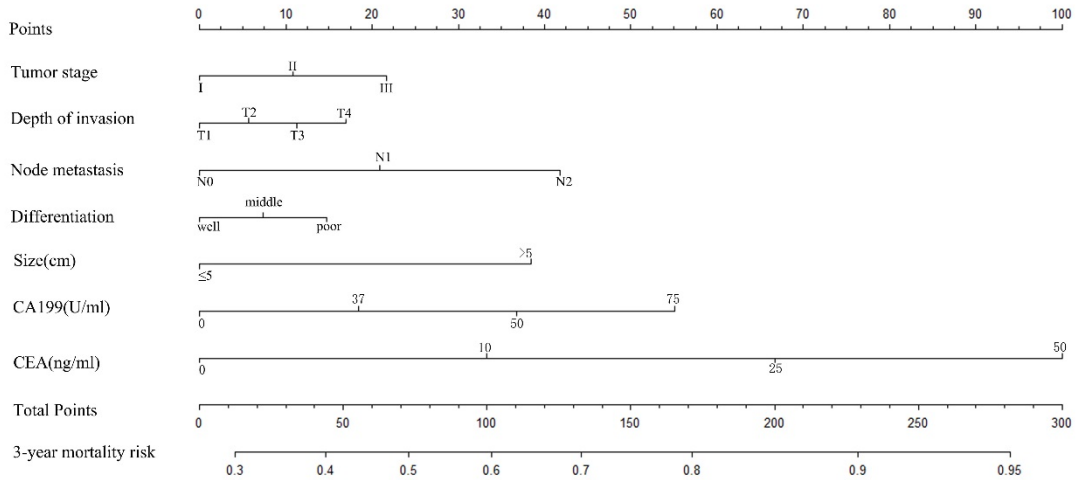

**b**

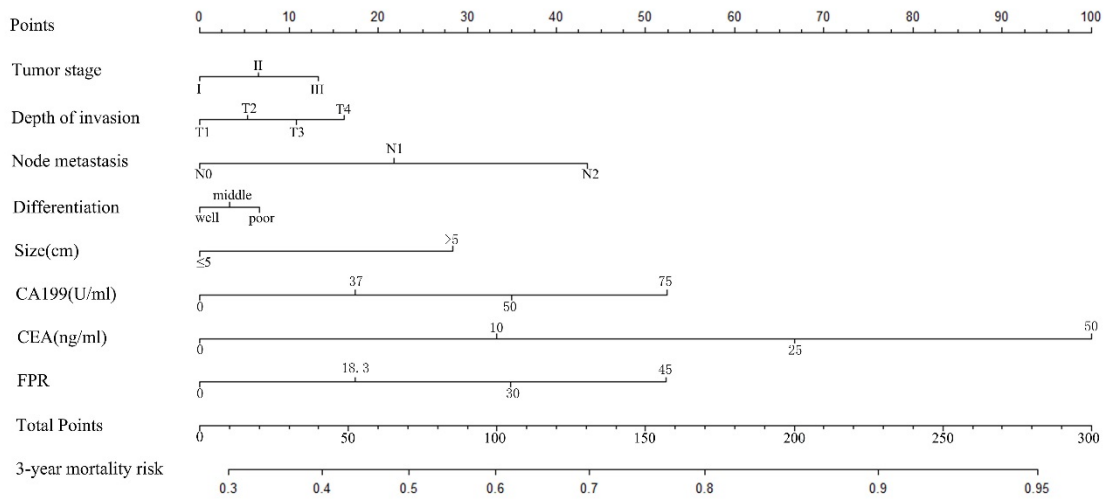

**Figure S3 Nomogram predicted 3-years' OS and evaluated the predicted accuracy of significant clinical pathological characteristics and the FPR.**

Abbreviations: CA199, carbohydrate antigen 19-9; CEA, carcinoembryonic antigen; CRC, colorectal cancer; FPR, fibrinogen-to-pre-albumin ratio; OS, overall survival.
